# Supplementary material for: The Pseudomonas aeruginosa T6SS Delivers a Periplasmic Toxin that Disrupts Bacterial Cell Morphology
Source: PubMed Central journal article supplement (PMC6899460; doi:10.1016/j.celrep.2019.08.094), 2019-10-01
Supplement: mmc1.pdf [file mmc1.pdf]

Cell Reports, Volume 29

## Supplemental Information

**The *Pseudomonas aeruginosa* T6SS**

**Delivers a Periplasmic Toxin**

**that Disrupts Bacterial Cell Morphology**

**Thomas E. Wood, Sophie A. Howard, Andreas Förster, Laura M. Nolan, Eleni Manoli, Nathan P. Bullen, Hamish C.L. Yau, Abderrahman Hachani, Richard D. Hayward, John C. Whitney, Waldemar Vollmer, Paul S. Freemont, and Alain Filloux**

**A**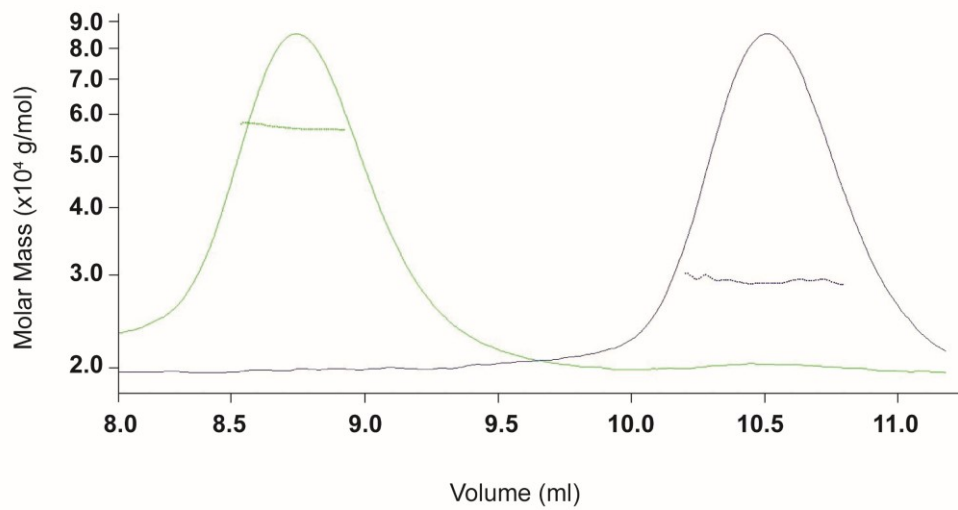**B**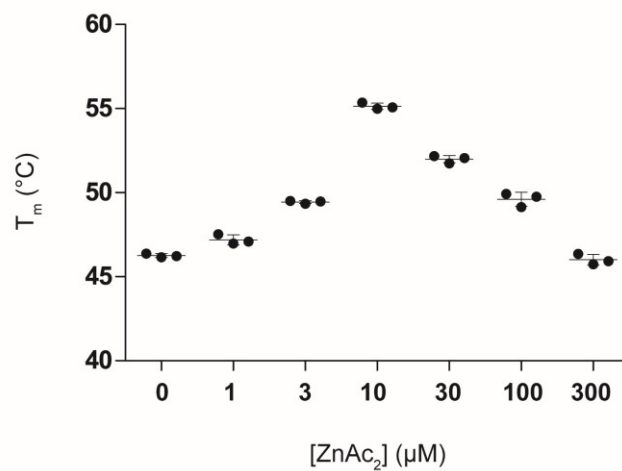

**Figure S1: The VgrG2b metallopeptidase exists as monomeric and dimeric species in solution and is stabilised by zinc. Related to Figure 2.**

**A** SEC-MALLS chromatogram of VgrG2b<sub>C-ter</sub> purified from *E. coli*. Solid lines show UV traces of fractions pooled from two peaks obtained after preparatory size-exclusion chromatography. Dashed lines across the peaks show the MALLS-derived apparent masses. The calculated weight-average molecular masses are 56.7 kD (left peak) and 29.1 kD (right peak) corresponding to the dimeric and monomeric species, respectively.

**B** Thermostability of the purified VgrG2b<sub>C-ter</sub> domain in the presence of different concentrations of zinc ions as determined by calculation of the melting temperature using differential scanning fluorimetry. Individual points represent the mean of three technical replicates with error bars showing the SEM ( $n = 3$  technical replicates).

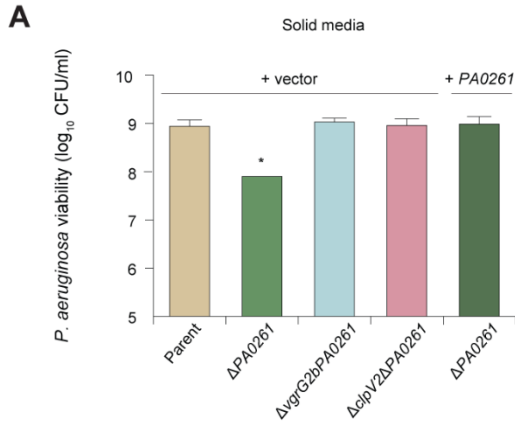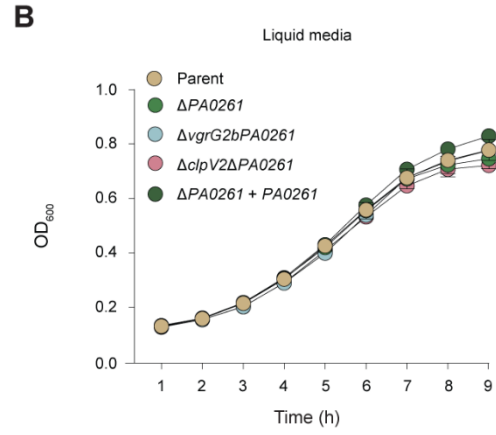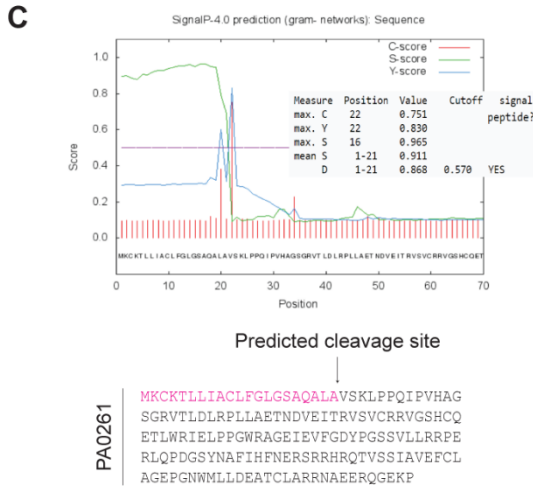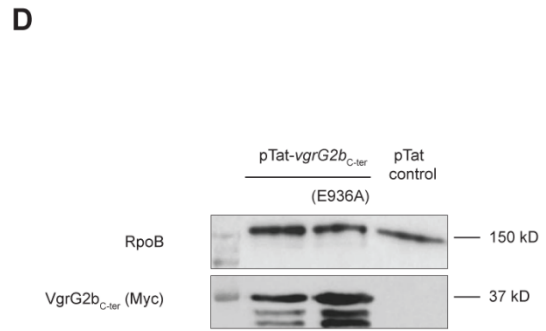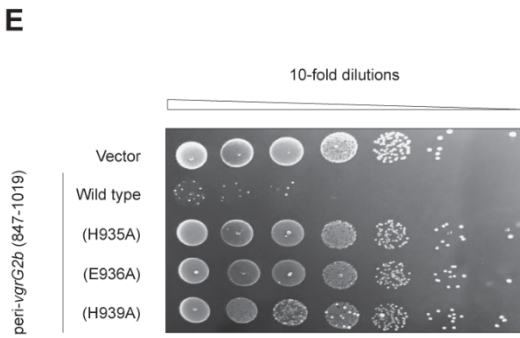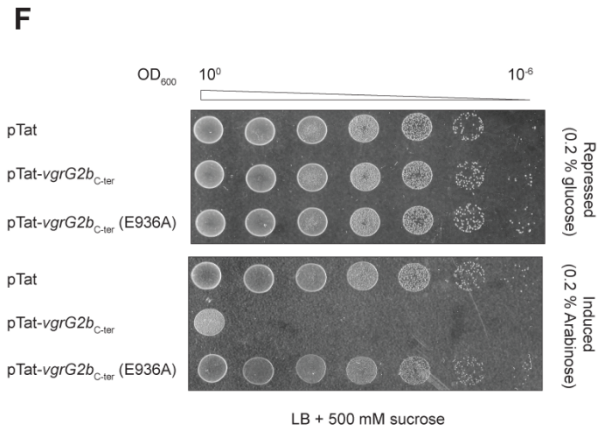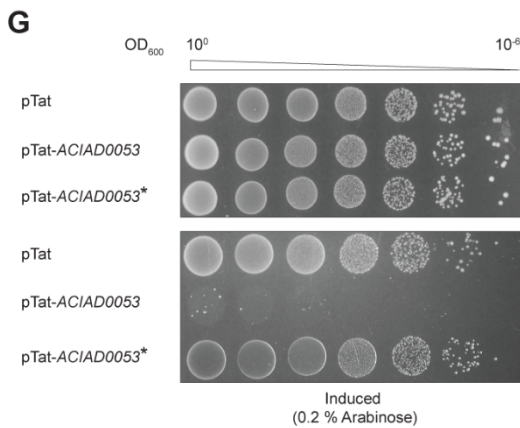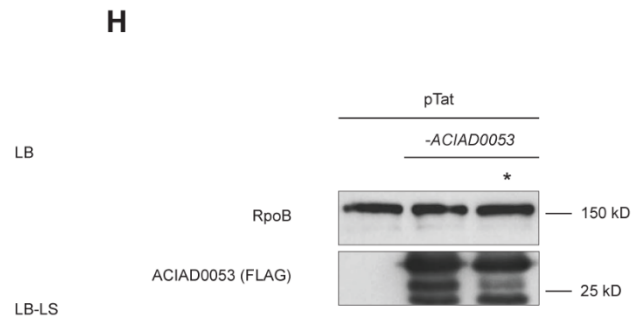

**Figure S2: Characterisation of the VgrG2b-PA0261 effector-immunity pair family. Related to Figure 4.**

**A** Self-intoxication assay of *P. aeruginosa* on solid media. Viability of the indicated strains assessed by enumeration of colony forming units (CFU). Here, the parental strain is *P. aeruginosa* PA14 $\Delta$ rsmA $\Delta$ amrZ. A statistically significant difference in recovered prey *versus* the parental strain was determined using a one-way ANOVA followed by Dunnett's multiple comparisons test ( $n = 3$  biological replicates; \*  $p < 0.05$ ).

**B** Self-intoxication assay of *P. aeruginosa* in liquid culture. Viability was measured by monitoring turbidity (OD<sub>600</sub>) in a 96-well format. The parental strain is the same as in panel A. Mean values are plotted from three biologically independent experiments, with error bars representing the standard deviation ( $n = 3$ ).

**C** The putative N-terminal signal peptide of PA0261. The upper panel shows the prediction output of the SignalP 4.1 server. The lower panel indicates the predicted signal peptide (in pink) and putative signal peptidase cleavage site within the sequence of the PA0261 polypeptide.

**D** Immunoblot showing that both active and inactive VgrG2b<sub>C-ter</sub> variants are produced in *E. coli* from the pTat plasmids. Both isoforms are detected with anti-myc antibodies to a C-terminal tag. RpoB is a loading control.

**E** *E. coli* periplasmic toxicity assay showing the requirement of the metallopeptidase catalytic triad. VgrG2b metallopeptidase constructs (residues 847-1019) were targeted to the periplasm by an N-terminal PelB signal peptide. Strains were serially diluted on solid media under inducing conditions. Image is representative of three independent experiments.

**F** Plating efficiency of *E. coli* harbouring pTat, pTat-*vgrG2b*<sub>C-ter</sub> or pTat-*vgrG2b*<sub>C-ter</sub> (E936A) in hypertonic conditions (LB agar with 500 mM sucrose). Expression from the plasmid is repressed with 0.2% glucose or induced with 0.2% arabinose.

**G** Targeting the *A. baylyi* VgrG2b<sub>C-ter</sub> metallopeptidase homologue ACIAD0053 to the *E. coli* periplasm using the TorA Tat-dependent signal peptide of the pTat vector. ACIAD0053\* is the catalytic mutant of the effector where the HEMGH motif (residues 102-106) has been mutated to AAMGA. Plating efficiency of ten-fold serially diluted *E. coli* cultures on LB agar or low-salt LB agar (LB-LS) containing 0.2% arabinose inducer are shown. Image is representative of three independent experiments.

**H** Immunoblot detecting the FLAG-tagged ACIAD0053 toxin and its inactive AAMGA variant (designated by the asterisk). RpoB is a loading control.

**A**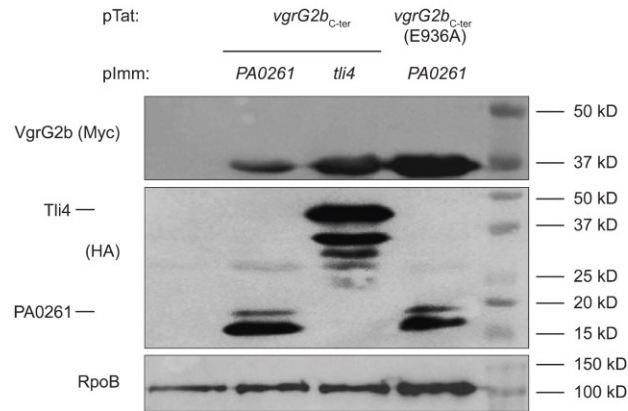**B**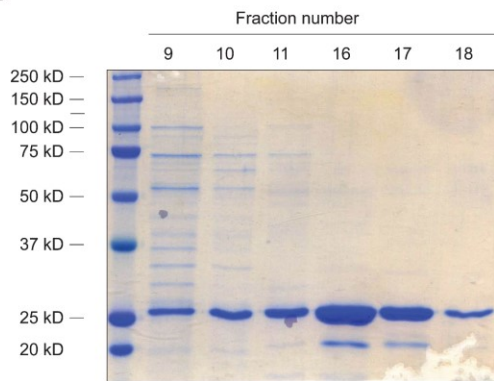**C**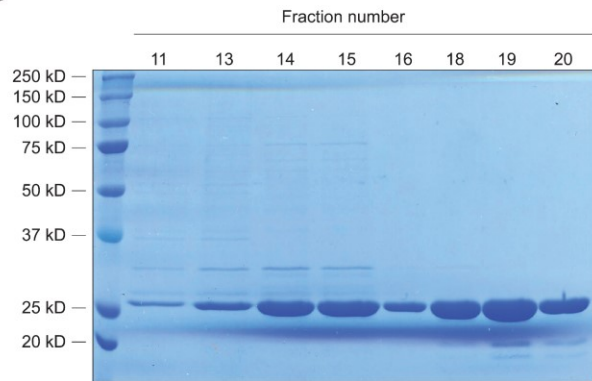**Figure S3: Production of immunity proteins and purification of  $VgrG2b_{C-ter}$ . Related to Figure 5.**

**A** Immunoblot showing the production of the Myc-tagged  $VgrG2b_{C-ter}$  effector and HA-tagged immunity proteins expressed in *E. coli*. RpoB acts as a loading control.

**B** and **C** SDS-PAGE analysis of recombinant  $VgrG2b_{C-ter}$  (**B**) and  $VgrG2b_{C-ter}$  (E936A) (**C**) elution after size-exclusion chromatography following  $Ni^{2+}$ -NTA affinity chromatography. Proteins were visualised by Coomassie staining. Fraction numbers are shown for each lane.

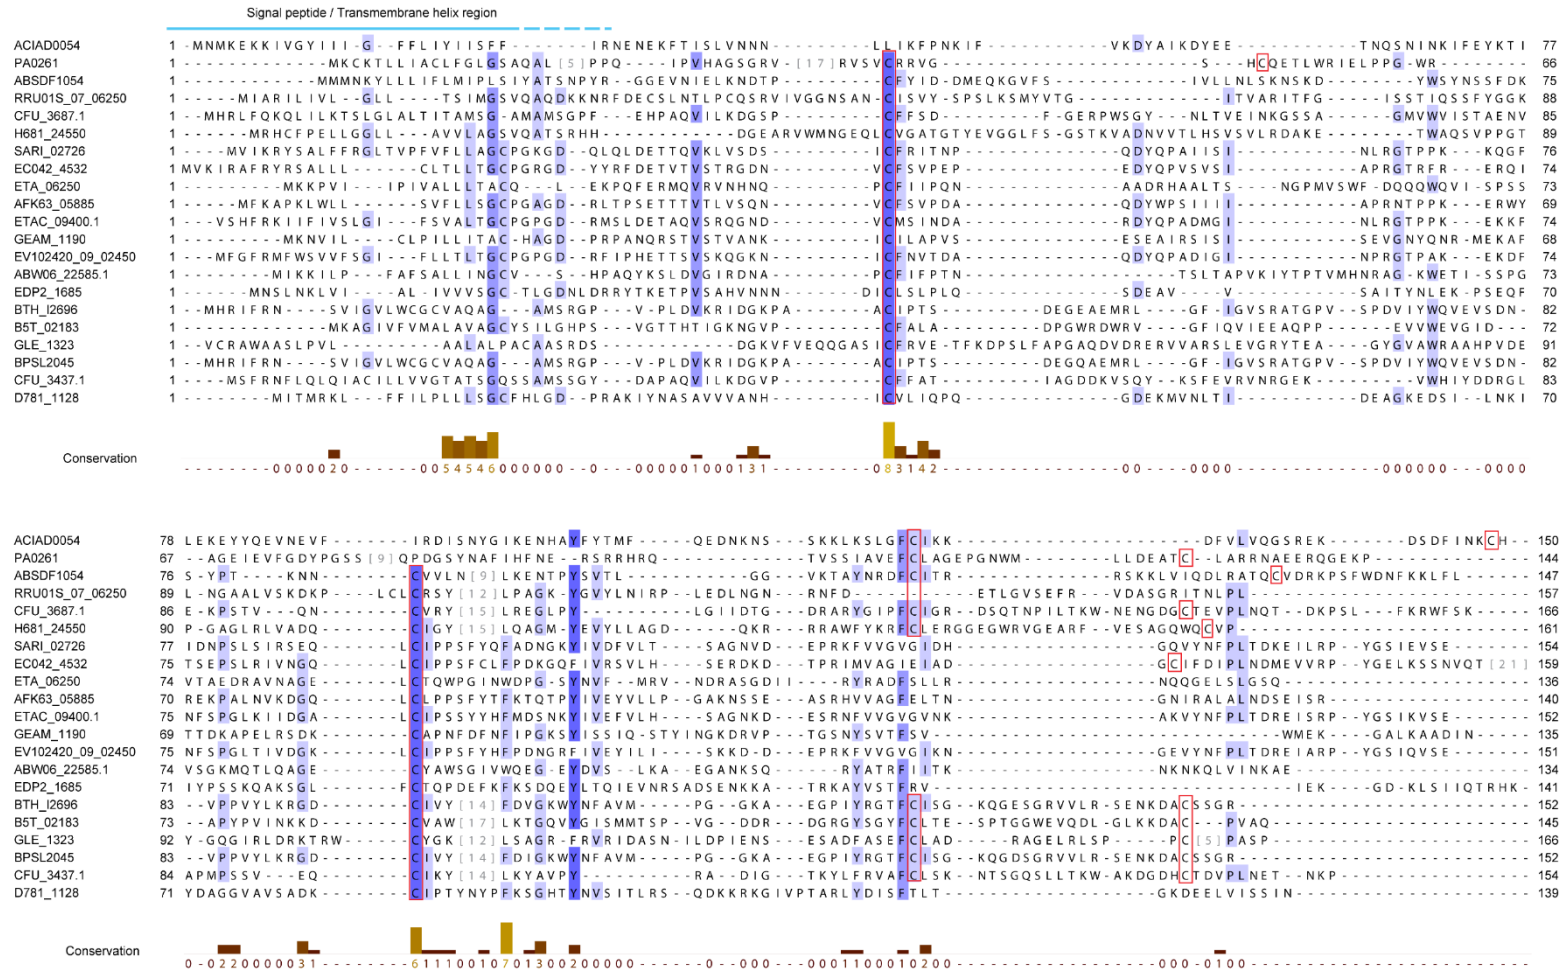

**Figure S4: Alignment of immunity proteins in the PA0261 family. Related to Figure 5.**

Multiple sequence alignment of putative immunity proteins for metallopeptidase effectors of the VgrG2b<sub>C-ter</sub> family. Due to low sequence homology, the alignment was manually curated after initial alignment by MAFFT. Omitted residues are shown in grey and cysteine residues are highlighted with red boxes. Darker coloration of the residues reflects the increasing conservation of identity, with the scores for each position shown below the alignment.

**A**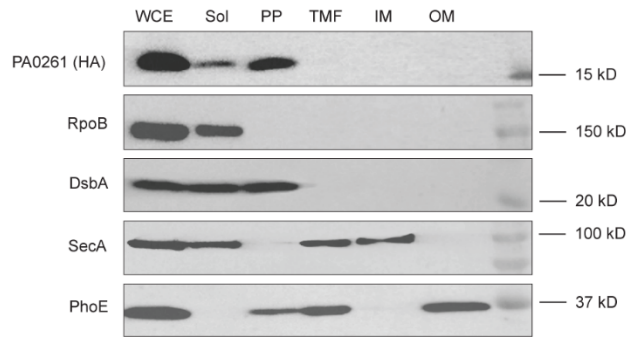**B**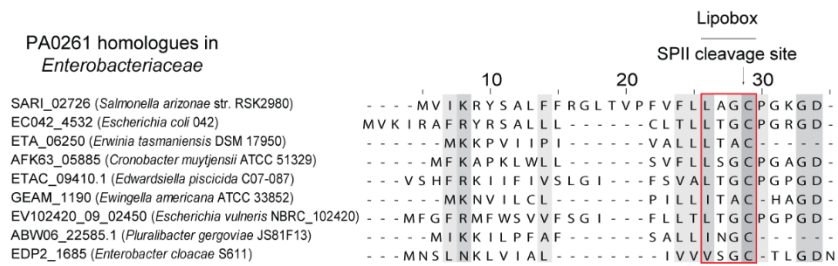**C**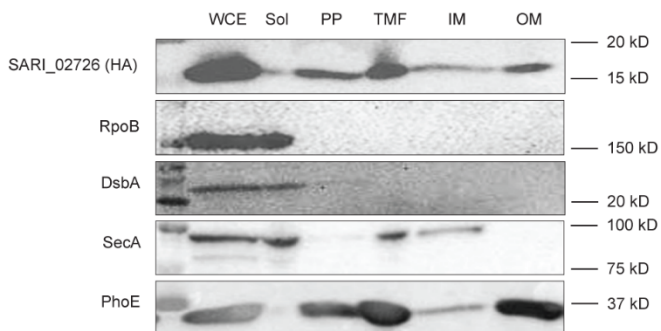**D**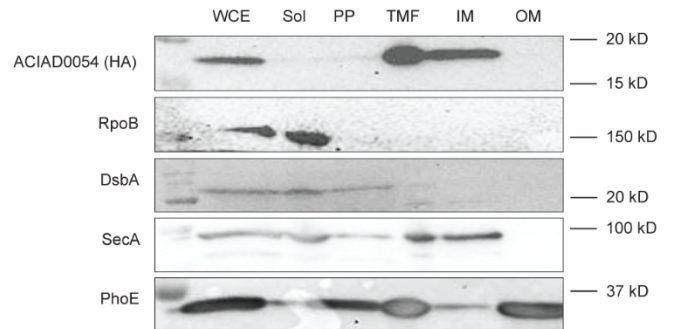**E**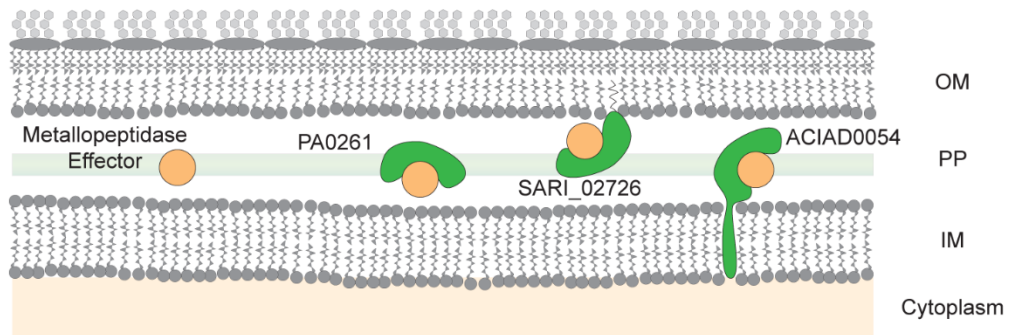

**Figure S5: Members of the PA0261 immunity protein family utilise diverse mechanisms to access the periplasmic compartment. Related to Figure 5.**

**A** Immunoblot analysis of the subcellular localisation of HA-tagged PA0261. RpoB is used as a marker of the soluble fraction (Sol), DsbA for the periplasm (PP), SecA for the inner membrane (IM) and PhoE for the outer membrane (OM). WCE: whole cell extract; TMF: total membrane fraction. Immunoblots are representative of three independent experiments.

**B** Multiple sequence alignment of the N-terminal region of PA0261 orthologues within *Enterobacteriaceae*. The red box demarcates a putative lipobox sequence and the predicted signal peptidase II (SPII) cleavage site is marked. Light to dark grey shading indicates an increasing level of residue conservation.

**C** and **D** Immunoblot of fractionated *E. coli* cells producing HA-tagged PA0261 orthologues from *S. arizonae* (SARI\_02726; **C**) and *A. baylyi* (ACIAD0054; **D**). See panel **A** for details of fraction markers.

**E** Model showing the subcellular localisation of the three metallopeptidase immunity proteins PA0261, SARI\_02726 and ACIAD0054. These immunity determinants, depicted in green, are a soluble periplasmic protein, an outer membrane lipoprotein and an inner membrane protein, respectively. The periplasmic VgrG2<sub>ter</sub>-family metallopeptidase is represented as an orange circle. Immunoblots are representative of three independent experiments.



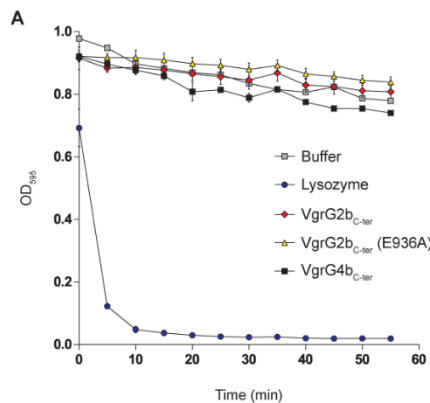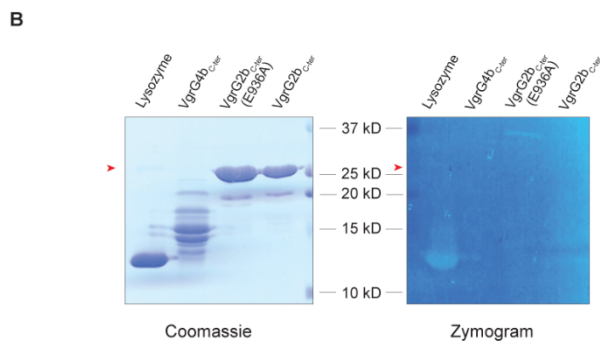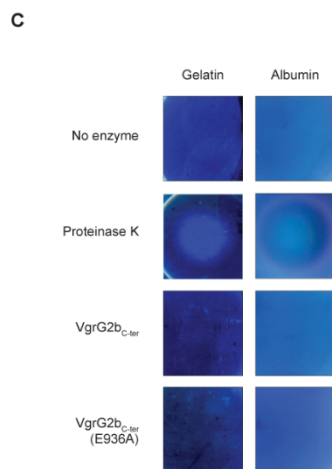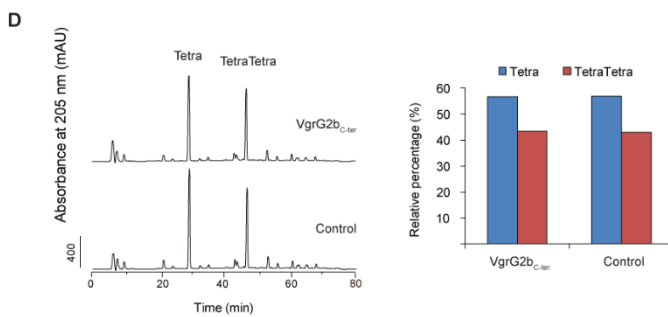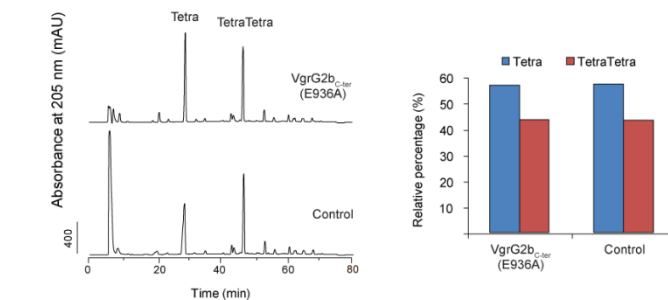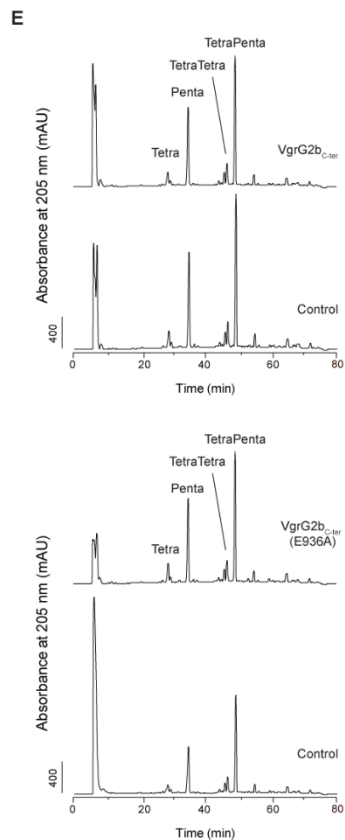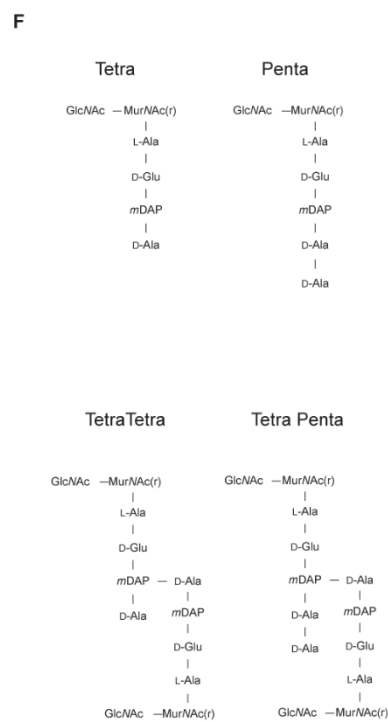

**Figure S6: VgrG2b<sub>C-ter</sub> displays no detectable peptidoglycan hydrolase or generic protease activity. Related to Figure 6.**

**A** Recombinant VgrG2b<sub>C-ter</sub> does not cause lysis of *M. lysodeikticus* as measured by turbidometry. Incubation with lysozyme acts as the positive control, while the buffer-only condition and addition of recombinant VgrG4b<sub>C-ter</sub> act as the negative controls. Points and error bars represent the mean  $\pm$  SEM ( $n = 3$  technical replicates).

**B** Recombinant VgrG2b<sub>C-ter</sub>, VgrG2b<sub>C-ter</sub> (E936A), VgrG4b<sub>C-ter</sub> and lysozyme were assessed for peptidoglycan hydrolytic activity by zymography with a purified *E. coli* peptidoglycan substrate. Samples were run on a 12% SDS-PAGE gel containing 0.1% peptidoglycan and stained with a methylene blue solution to visualise zones of clearing, indicative of peptidoglycan hydrolysis. A Coomassie-stained gel acts as a loading control for the purified proteins. The arrows highlight the location of the band corresponding to VgrG2b<sub>C-ter</sub>.

**C** 10  $\mu$ g VgrG2b<sub>C-ter</sub>, VgrG2b<sub>C-ter</sub> (E936A) or proteinase K was spotted onto bacteriological agar plates containing 1% bovine serum albumin or gelatin. After incubation at 37 °C for 24 h, amido black staining was used to visualise zones of clearing indicative of proteolytic activity.

**D** and **E** HPLC chromatograms showing the profiles of the major muropeptides (*left panels*) released from tetrapeptide-rich *E. coli* MC1061 (**D**) and pentapeptide-rich CS703/1 (**E**) sacculi after incubation with VgrG2b<sub>C-ter</sub>, VgrG2b<sub>C-ter</sub> (E936A) or a buffer-only control. The composition of muropeptide species in control and assay reactions is also shown (*right panels*).

**F** Structures of the muropeptides shown in panels **D** and **E**. Abbreviations: GlcNAc, *N*-acetylglucosamine; MurNAc(r), *N*-acetylmuramitol; L-Ala, L-alanine; D-Glu, D-glutamic acid; *m*DAP, *meso*-diaminopimelic acid; D-Ala, D-alanine.

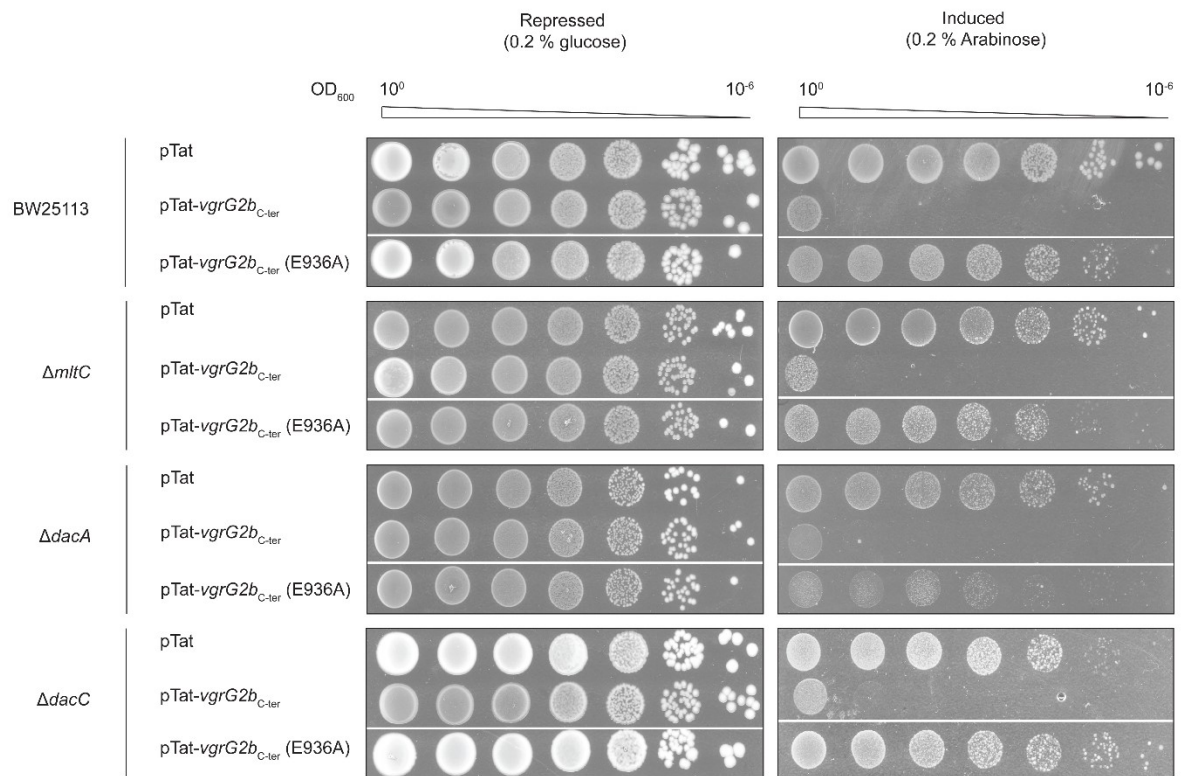

**Figure S7: MltC, PBP5 and PBP6a individually dispensable for VgrG2b<sub>C-ter</sub>-mediated toxicity. Related to Figure 7.**

Plating efficiency of *E. coli* strains harbouring pTat vector, pTat-*vgrG2b*<sub>C-ter</sub> or pTat-*vgrG2b*<sub>C-ter</sub> (E936A). Strains are wild type BW25113, *mltC*, *dacA* (encoding PBP5) and *dacC* (encoding PBP6a) mutants. Serial dilutions assessed toxicity in repressive (0.2% glucose) and inducing (0.2% arabinose) conditions. Images are representative of three biological replicates.

**Table S1**

|                                                                    | VgrG2b (833-1013)                    |
|--------------------------------------------------------------------|--------------------------------------|
| Data processing                                                    |                                      |
| Wavelength (Å)                                                     | 0.9795                               |
| Resolution Range (Å)                                               | 43.9 - 3.2 (3.42 - 3.2) <sup>a</sup> |
| Space Group                                                        | <i>P</i> 3 <sub>1</sub>              |
| Unit Cell                                                          |                                      |
| <i>a</i> , <i>b</i> , <i>c</i> (Å)                                 | 78.3, 78.3, 115.3                    |
| $\alpha$ , $\beta$ , $\gamma$ (°)                                  | 90, 90, 120                          |
| Total Reflections                                                  | 45339                                |
| Unique Reflections                                                 | 12782                                |
| Multiplicity                                                       | 3.5 (3.6) <sup>a</sup>               |
| Completeness (%)                                                   | 99.6 (99.9) <sup>a</sup>             |
| <i>I</i> / $\sigma$ <i>I</i>                                       | 12.5 (2.0) <sup>a</sup>              |
| <i>d</i> <sub>min</sub> for <i>I</i> / $\sigma$ <i>I</i> > 1.0 (Å) | 3.1                                  |
| Wilson B-factor                                                    | 123.5                                |
| R <sub>sym</sub> (%)                                               | 5.7 (46.2) <sup>a</sup>              |
| Model refinement                                                   |                                      |
| R value                                                            | 0.223                                |
| R <sub>free</sub>                                                  | 0.232                                |
| Number of Atoms                                                    | 2745                                 |
| Protein Residues                                                   | 360                                  |
| Water Molecules                                                    | 0                                    |
| Root-mean-square Deviations                                        |                                      |
| Bond lengths (Å)                                                   | 0.009                                |
| Bond angles (°)                                                    | 1.01                                 |
| Ramachandran Favoured (%)                                          | 95.5%                                |
| Ramachandran Outliers (%)                                          | 0                                    |
| Clash Score                                                        | 4                                    |

a. Values within parentheses denote the resolution of the highest resolution shell

**Table S1: Data collection and refinement statistics for the crystal structure of the VgrG2b metallopeptidase domain. Related to Figure 2.**

**Table S2**

|                                                    | Pos 1                          | Pos 4                          | Pos 5                          | Pos 6                          | All data                       |
|----------------------------------------------------|--------------------------------|--------------------------------|--------------------------------|--------------------------------|--------------------------------|
| <b>Data collection</b>                             |                                |                                |                                |                                |                                |
| Wavelength (Å)                                     | 0.97949                        |                                |                                |                                |                                |
| Oscillation width (°)                              | 0.15                           |                                |                                |                                |                                |
| Number of images                                   | 2400                           |                                |                                |                                | 9600                           |
| <b>Data processing</b>                             |                                |                                |                                |                                |                                |
| Space group                                        | P 4 2 2                        |                                |                                |                                |                                |
| Unit cell parameters                               | 168.8, 79.37                   | 169.4, 79.37                   | 169.4, 79.20                   | 168.7, 79.15                   | 168.8, 79.37                   |
| Resolution range (Å)                               | 40-2.7 (2.86-2.7) <sup>a</sup> | 40-2.8 (2.97-2.8) <sup>a</sup> | 40-2.9 (3.07-2.9) <sup>a</sup> | 40-2.8 (2.97-2.8) <sup>a</sup> | 40-2.7 (2.85-2.7) <sup>a</sup> |
| Unique reflections                                 | 60251 (9706) <sup>a</sup>      | 54432 (8760) <sup>a</sup>      | 48913 (7849) <sup>a</sup>      | 53864 (8712) <sup>a</sup>      | 60184 (8967) <sup>a</sup>      |
| Multiplicity                                       | 14.0 (13.5) <sup>a</sup>       | 13.6 (12.1) <sup>a</sup>       | 13.7 (13.6) <sup>a</sup>       | 13.5 (12.2) <sup>a</sup>       | 49.3 (20.6) <sup>a</sup>       |
| R <sub>meas</sub> (lowest resolution)              | 0.073                          | 0.061                          | 0.071                          | 0.079                          | 0.095                          |
| ISa                                                | 14.7                           | 16.7                           | 21.8                           | 14.2                           | N/A                            |
| R <sub>meas</sub>                                  | 0.323 (6.17) <sup>a</sup>      | 0.304 (9.26) <sup>a</sup>      | 0.413 (8.15) <sup>a</sup>      | 0.345 (6.53) <sup>a</sup>      | 0.381 (7.60) <sup>a</sup>      |
| Completeness                                       | 0.999 (0.998) <sup>a</sup>     | 0.999 (0.999) <sup>a</sup>     | 0.999 (0.997) <sup>a</sup>     | 1.000 (1.000) <sup>a</sup>     | 0.999 (0.999) <sup>a</sup>     |
| $\langle I/\sigma(I) \rangle$                      | 6.66 (0.13) <sup>a</sup>       | 7.80 (0.16) <sup>a</sup>       | 7.38 (0.22) <sup>a</sup>       | 6.65 (0.23) <sup>a</sup>       | 9.91 (0.13) <sup>a</sup>       |
| CC <sub>1/2</sub>                                  | 0.997 (0.277) <sup>a</sup>     | 0.997 (0.124) <sup>a</sup>     | 0.996 (0.201) <sup>a</sup>     | 0.997 (0.256) <sup>a</sup>     | 0.999 (0.251) <sup>a</sup>     |
| d <sub>min</sub> for I/sig(I) > 1.0 (Å)            | 3.0                            | 3.1                            | 3.2                            | 3.1                            | 3.0                            |
| d <sub>min</sub> for SigAno <sup>b</sup> > 1.0 (Å) | 4.65                           | 4.82                           | 3.88                           | 4.19                           | 4.27                           |

a. Values within parentheses denote the resolution of the highest resolution shell

b. SigAno =  $|F^+ - F^-|/\sigma(F)$

**Table S2: Data collection and processing statistics for crystals of selenomethionine-derivatised VgrG2b metallopeptidase domain. Related to Figure 2.**

**Table S3**

| UniProt Accession               | Protein <sup>a</sup> | Replicate 1  |                 |                  |                  | Replicate 2  |                 |                  |                  |                  | Replicate 3  |                 |                  |                  |                  |
|---------------------------------|----------------------|--------------|-----------------|------------------|------------------|--------------|-----------------|------------------|------------------|------------------|--------------|-----------------|------------------|------------------|------------------|
|                                 |                      | Coverage (%) | Unique Peptides | MASCOT Score (a) | MASCOT Score (b) | Coverage (%) | Unique Peptides | MASCOT Score (a) | MASCOT Score (b) | MASCOT Score (c) | Coverage (%) | Unique Peptides | MASCOT Score (a) | MASCOT Score (b) | MASCOT Score (c) |
| Cell envelope                   |                      |              |                 |                  |                  |              |                 |                  |                  |                  |              |                 |                  |                  |                  |
| Q9I6M7                          | VgrG2bc-ter (E936A)  | 88           | 26              |                  | 14949            | 95           | 29              | 2014             | 24367            | 4989             | 92           | 26              | 298              | 8024             | 192              |
| P0C066                          | MltC <sup>d</sup>    | 62           | 12              |                  | 489              |              |                 |                  |                  |                  | 35           | 6               |                  | 103              |                  |
| P76537                          | YfeY <sup>d</sup>    | 37           | 4               |                  | 155              | 36           | 4               |                  | 159              |                  | 29           | 4               | 0                | 379              | 26               |
| P08506                          | PBP6a                |              |                 |                  |                  | 58           | 14              | 46               | 455              |                  | 44           | 15              | 30               | 172              |                  |
| P0AEB4                          | PBP5                 |              |                 |                  |                  | 58           | 18              | 215              | 417              |                  | 29           | 9               | 23               | 156              | 23               |
| P18392                          | RstB                 |              |                 |                  |                  | 13           | 4               |                  | 237              |                  | 17           | 5               |                  | 203              |                  |
| P0A938                          | BamE <sup>d</sup>    | 76           | 3               |                  | 199              |              |                 |                  |                  |                  | 76           | 3               | 0                | 166              |                  |
| P69778                          | Lpp <sup>d</sup>     | 33           | 2               | 28               | 131              | 33           | 2               | 53               | 129              |                  | 33           | 2               | 16               | 283              | 20               |
| A7ZKY3                          | LolB <sup>d</sup>    | 54           | 9               |                  | 227              |              |                 |                  |                  |                  | 46           | 8               |                  | 113              |                  |
| P0AC04                          | BamD <sup>d</sup>    |              |                 |                  |                  | 33           | 6               | 119              | 250              |                  | 39           | 7               |                  | 152              |                  |
| P77774                          | BamB <sup>d</sup>    |              |                 |                  |                  | 47           | 10              | 77               | 189              |                  | 35           | 9               | 14               | 157              |                  |
| P0A903                          | BamC <sup>d</sup>    | 22           | 5               | 14               | 153              |              |                 |                  |                  |                  | 46           | 9               | 45               | 129              |                  |
| P0AAS1                          | YlaC                 |              |                 |                  |                  | 33           | 4               | 31               | 195              |                  | 33           | 5               |                  | 134              |                  |
| Cytoplasmic                     |                      |              |                 |                  |                  |              |                 |                  |                  |                  |              |                 |                  |                  |                  |
| P0ACZ8                          | CusR                 | 52           | 11              | 326              | 824              | 45           | 7               | 72               | 251              | 211              |              |                 |                  |                  |                  |
| P13035                          | GlpD                 |              |                 |                  |                  | 69           | 28              | 56               | 1063             |                  | 33           | 13              | 44               | 169              | 28               |
| P26616                          | MaeA                 | 32           | 9               | 20               | 287              | 52           | 19              | 287              | 695              |                  |              |                 |                  |                  |                  |
| P67095                          | YfeE                 |              |                 |                  |                  | 36           | 4               | 39               | 154              | 35               | 28           | 3               | 19               | 100              | 25               |
| P0AGK8                          | IscR                 | 38           | 3               | 35               | 108              | 54           | 4               | 34               | 220              | 0                |              |                 |                  |                  |                  |
| P0AEZ1                          | MetF                 | 23           | 5               | 58               | 117              | 20           | 4               | 40               | 133              | 61               |              |                 |                  |                  |                  |
| P00561                          | ThrA                 |              |                 |                  |                  | 30           | 13              | 49               | 224              |                  | 13           | 8               | 34               | 136              | 40               |
| Cell envelope (below threshold) |                      |              |                 |                  |                  |              |                 |                  |                  |                  |              |                 |                  |                  |                  |
| P69412                          | RcsF <sup>d</sup>    | 26           | 3               |                  | 158              |              |                 |                  |                  |                  | 10           | 1               |                  | 33               |                  |

a: BL21 pET22b-*vgrG2bc-ter* (E936A)

b: BL21 pET22b-*vgrG2bc-ter* (E936A)-*strepII*

c: BL21 pET22b-*vgrG2ac-ter* -*strepII*

d: Lipoprotein

**Table S3: Interactome of VgrG2b<sub>C-ter</sub> (E936A) in the *E. coli* cell envelope. Related to Figure 7.**

The MASCOT scores indicate the enrichment of the proteins pulled down within the three independent replicates, presenting the interactome of periplasmic VgrG2b<sub>C-ter</sub> (E936A) in *E. coli*. Proteins localised in the cytoplasm were discounted as relevant interaction partners. The UniProt accession number, defining identity of interacting partners, is also shown alongside the coverage and the number of unique peptides found in each replicate. The MASCOT score corresponds to  $-10\log(P)$ , where  $P$  is the calculated probability that the observed match between the experimental data and the database sequence is a random event and serves as a statistical representation of the positive identification of the protein in the sample, with higher scores being more significant. Note that replicates were entirely independent so quantitative comparisons may not be conducted.
