# Supplementary material for: The Pseudomonas aeruginosa T6SS Delivers a Periplasmic Toxin that Disrupts Bacterial Cell Morphology
Source: PubMed Central journal article supplement (PMC6899460; doi:10.1016/j.celrep.2019.08.094), 2019-10-01

Figure 1D

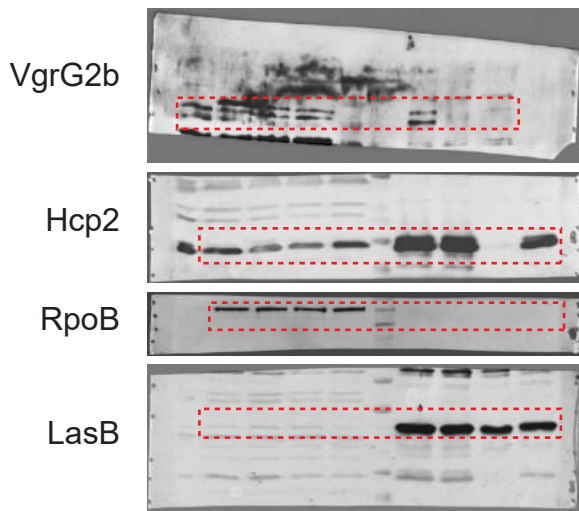

Figure 5B

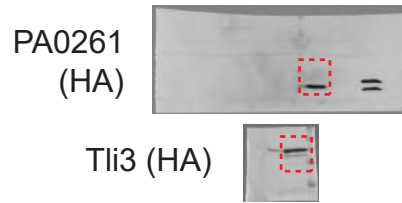

Figure 5D

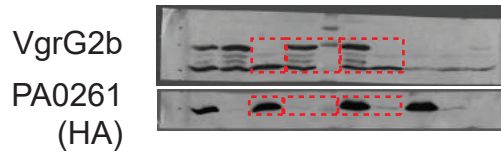

Figure 7

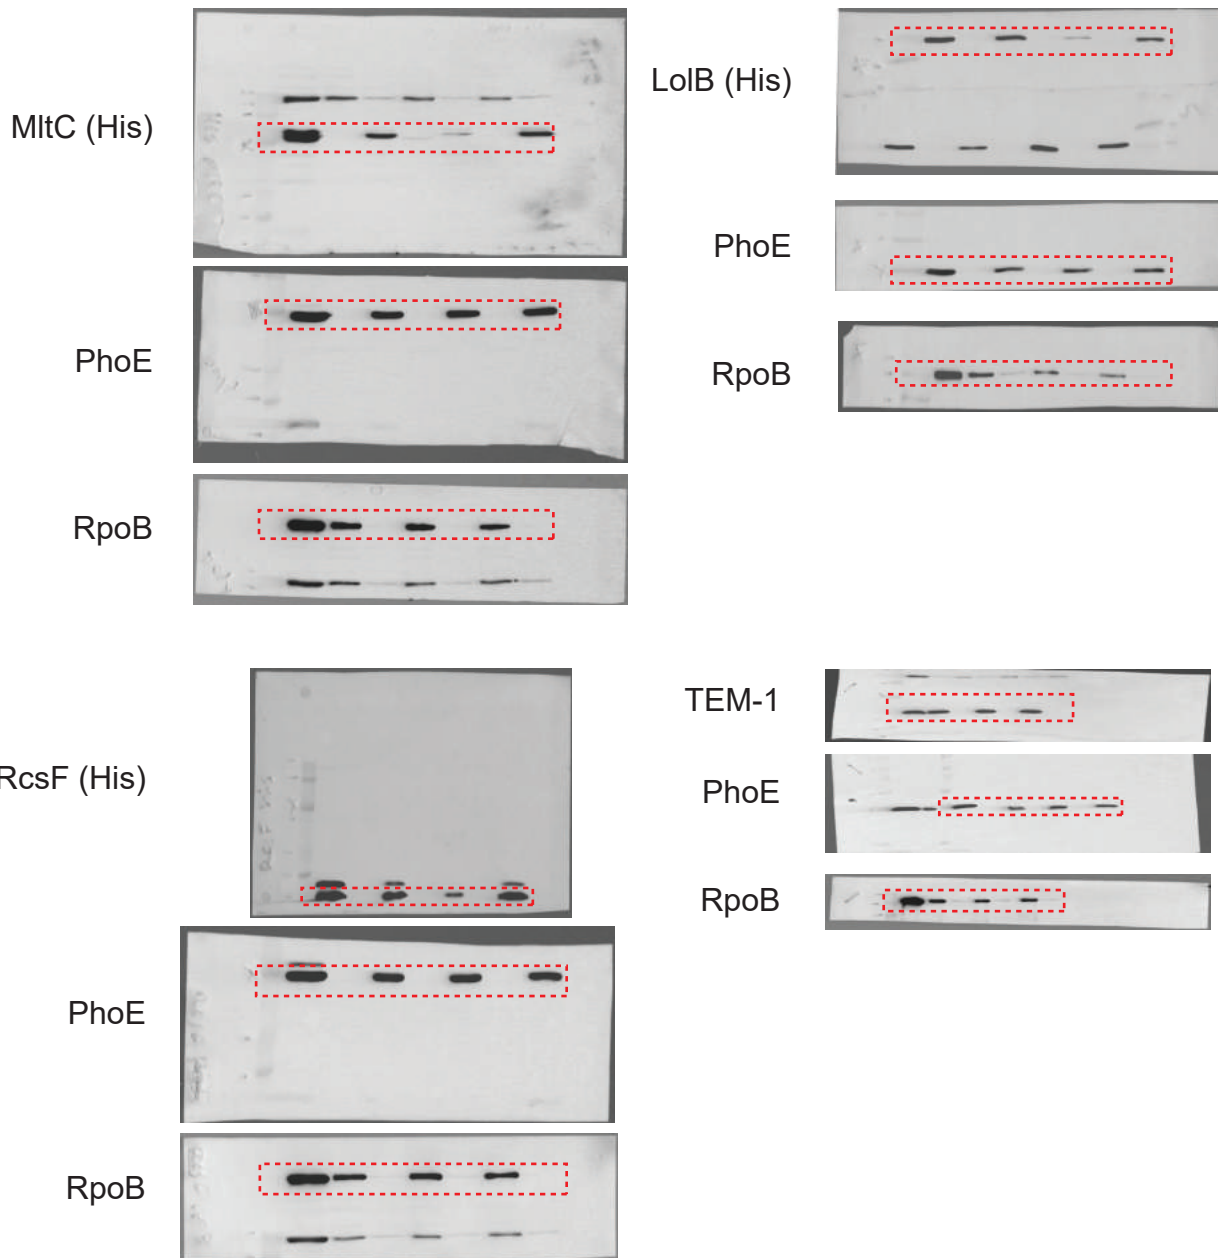

Figure S2

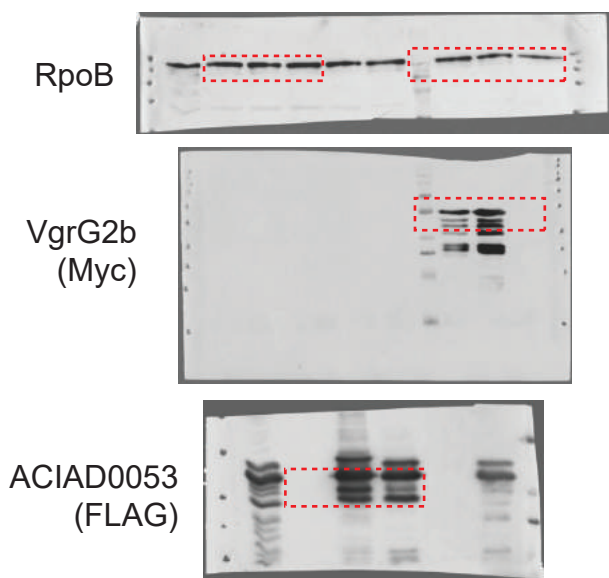

Figure S3

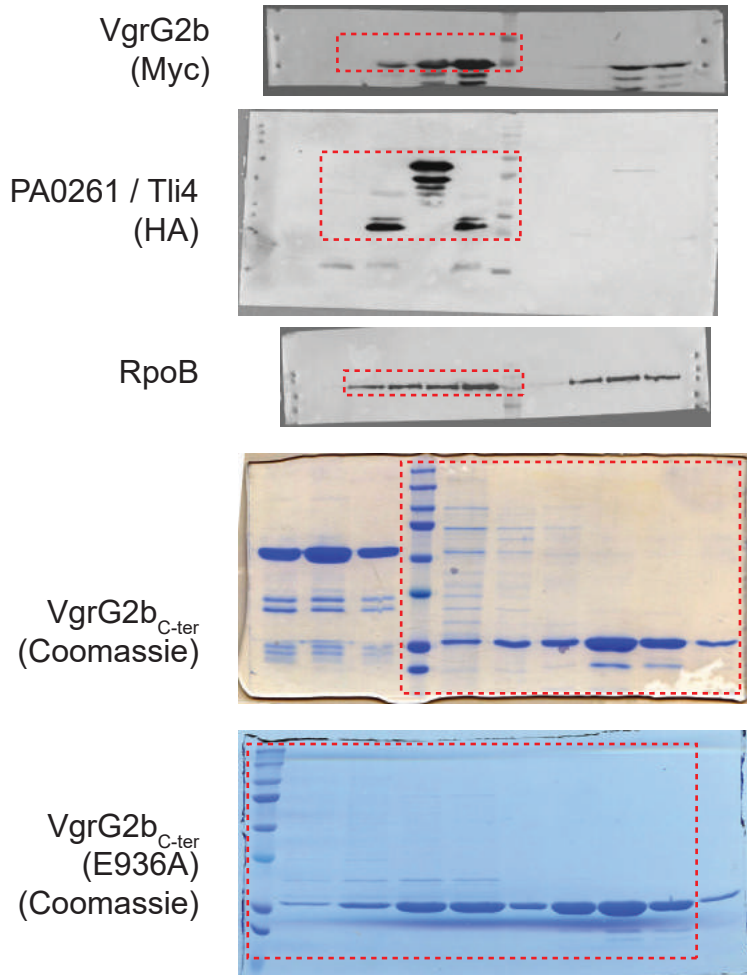

Figure S6B

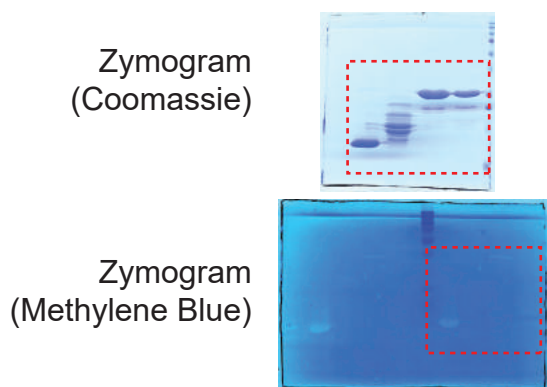

Figure S5

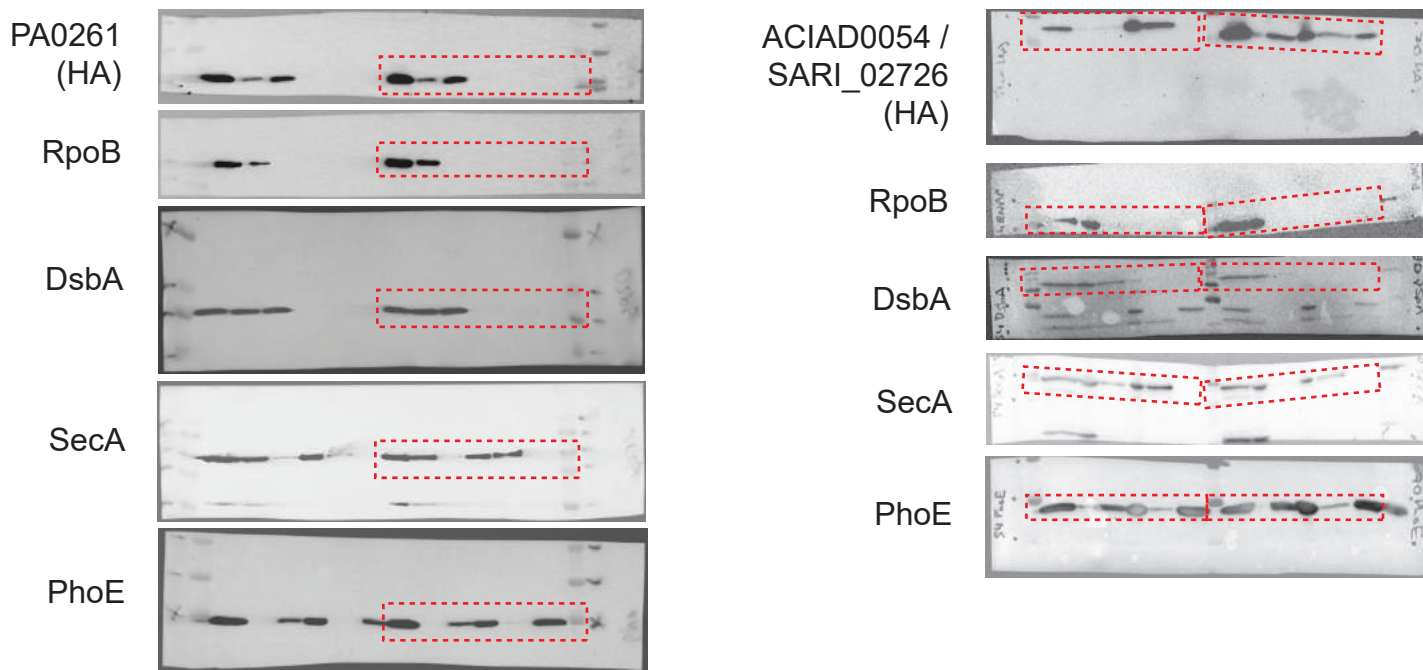

Supplement: mmc3.pdf [file mmc3.pdf]
